# Supplementary material for: Structural characteristic of a sulfated polysaccharide from Gracilaria Lemaneiformis and its lipid metabolism regulation effect
Source: Royal Society of Chemistry journal article supplement (doi:10.1039/d0fo02575e), 2020-01-01
Supplement: d0fo02575e1.pdf [file d0fo02575e1.pdf]

## Supplementary material

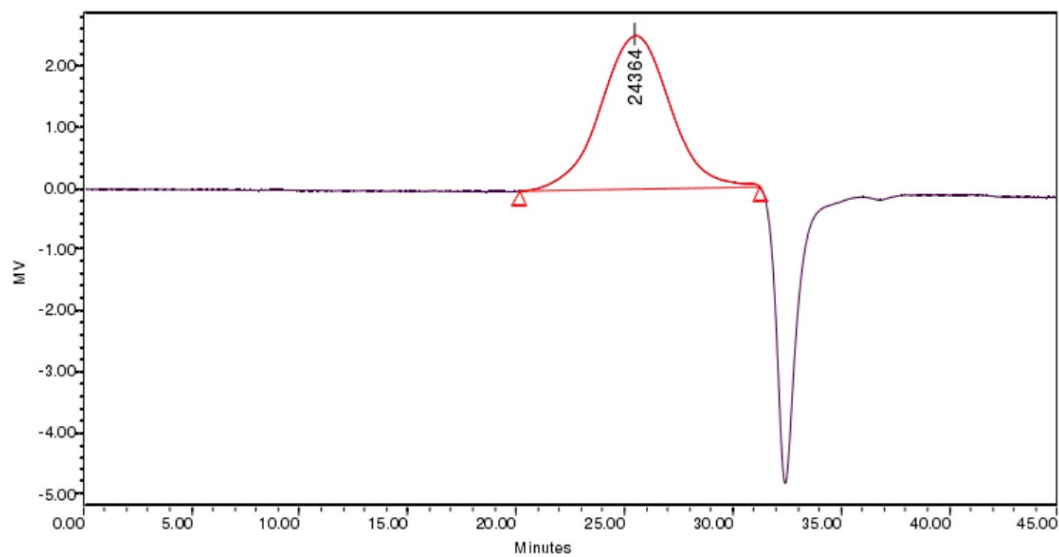

Fig. S1. HPGPC of GLP. The X axis is retention time, Y axis is RI response.

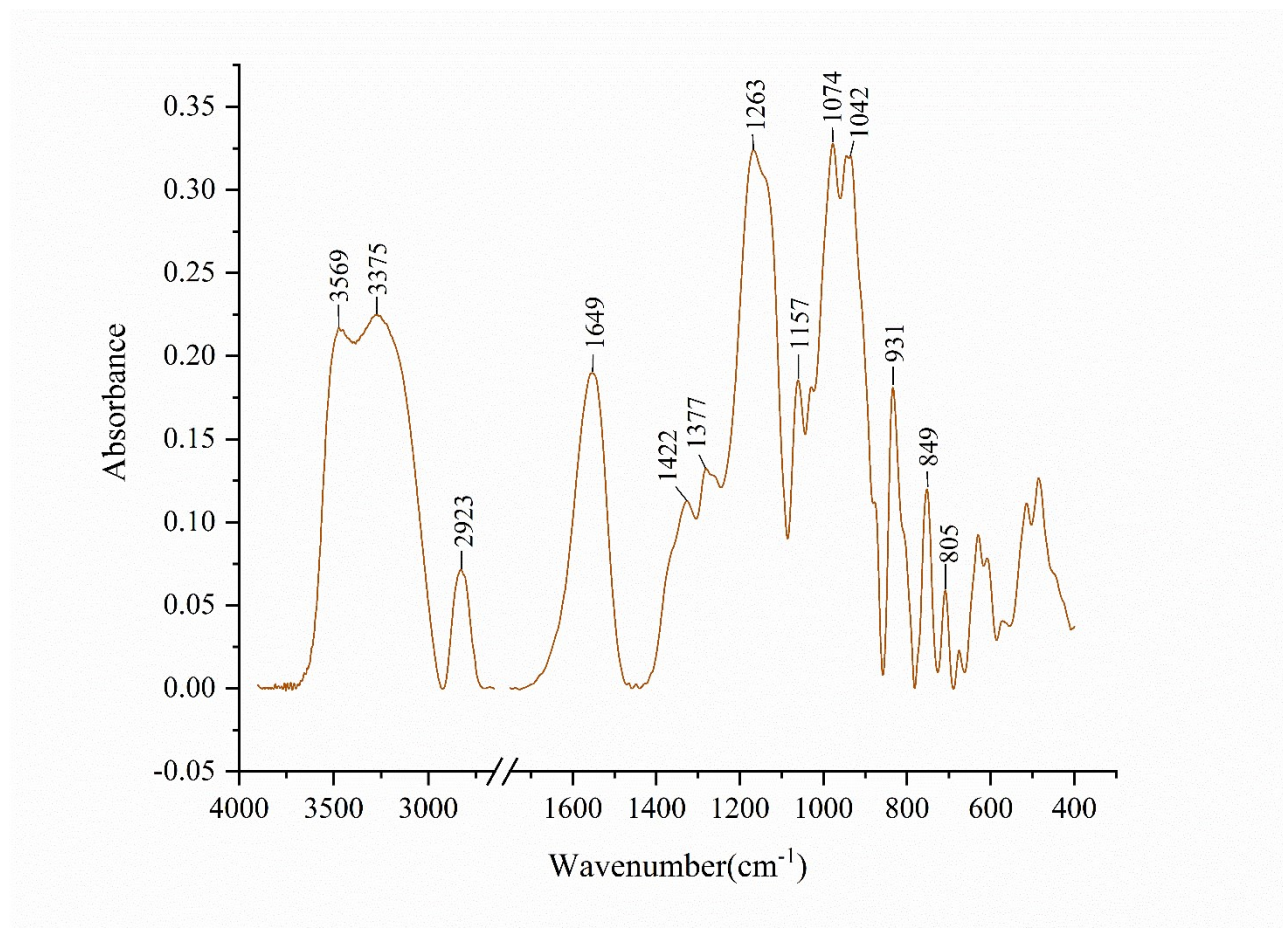

Fig. S2 IR spectrum of GLP.

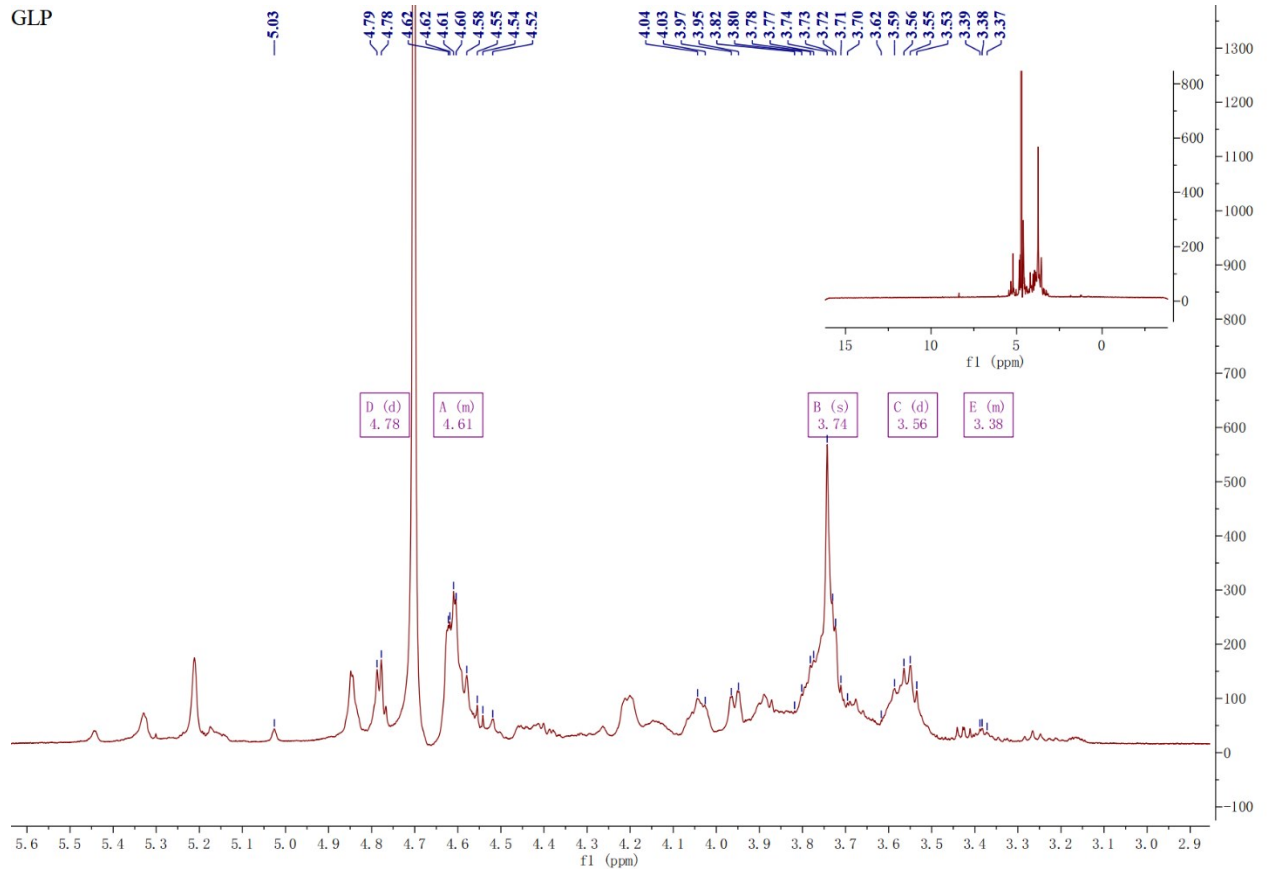

iota-Carrageenan

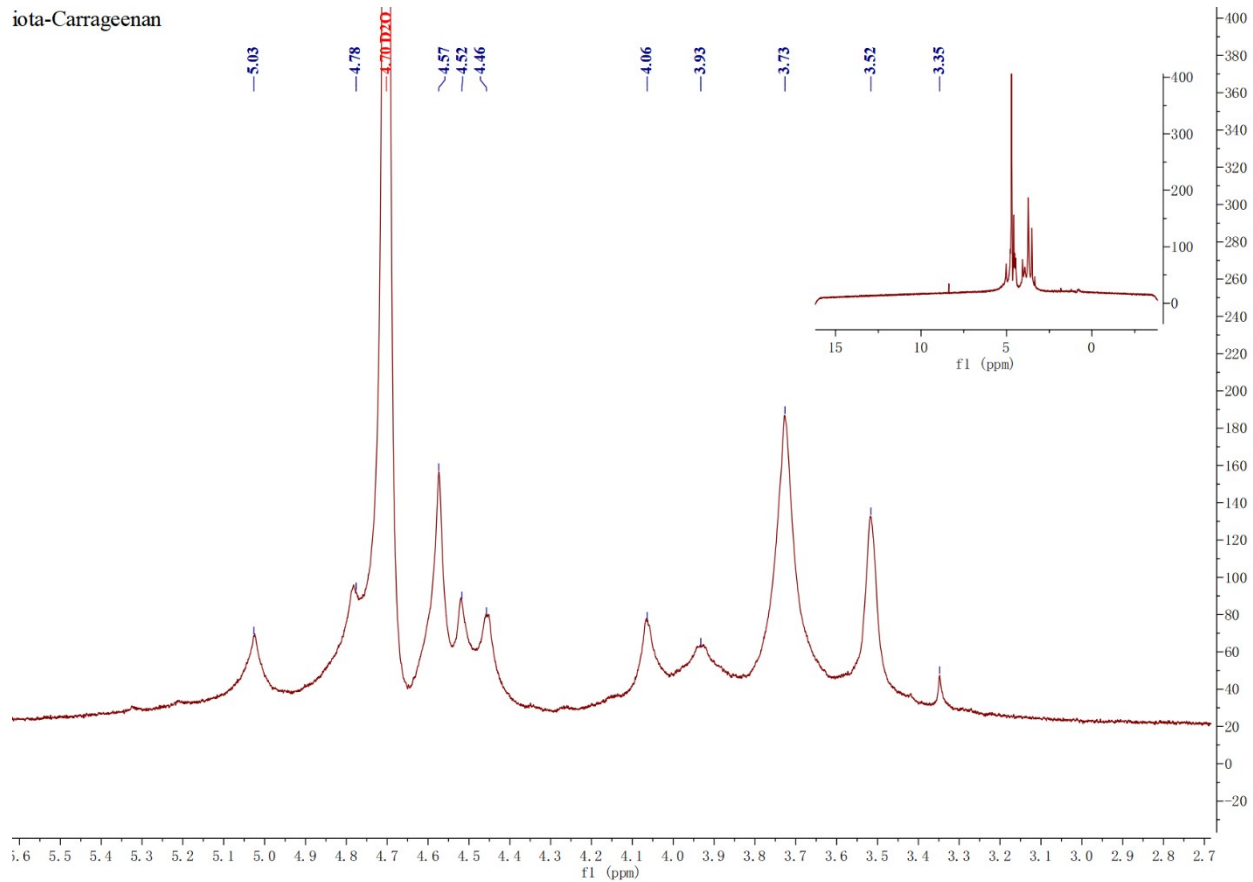

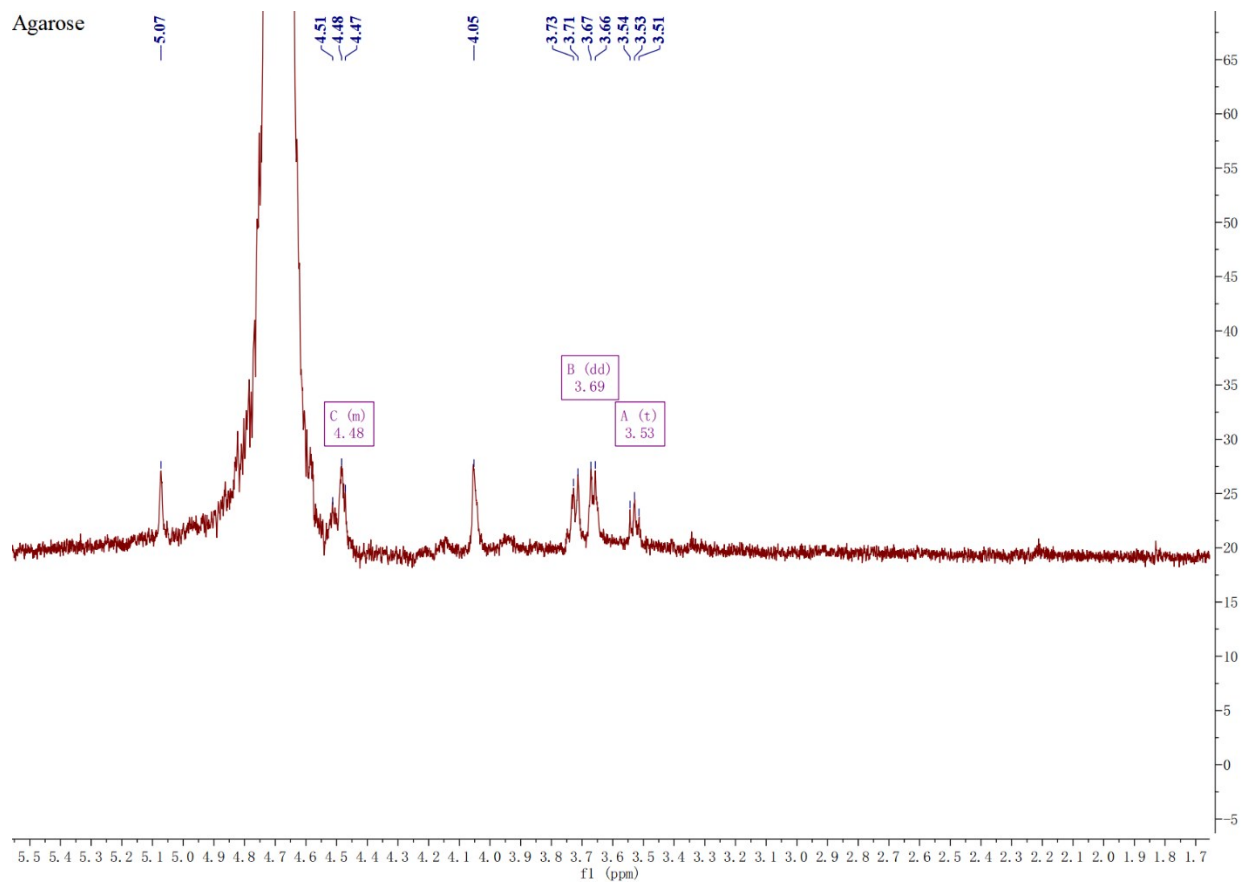

**Fig. S3** <sup>1</sup>H spectrum of GLP, ι-carrageenan and agarose. The anhydrogalactose content of GLP, ι-carrageenan and agarose were  $15.3 \pm 0.4$ ,  $22.3 \pm 0.2$  and  $41 \pm 1\%$ , respectively.
